# Supplementary figures and images for: SOX2 regulates paclitaxel resistance of A549 non-small cell lung cancer cells via promoting transcription of ClC-3
Source: PubMed Central journal article supplement — Oncol Rep. 2022 Sep 6;48(4):181. doi: 10.3892/or.2022.8396 (PMC9478990; doi:10.3892/or.2022.8396), 2022-09-06

Figure S1. Flowchart of the study methodologies for each stage.

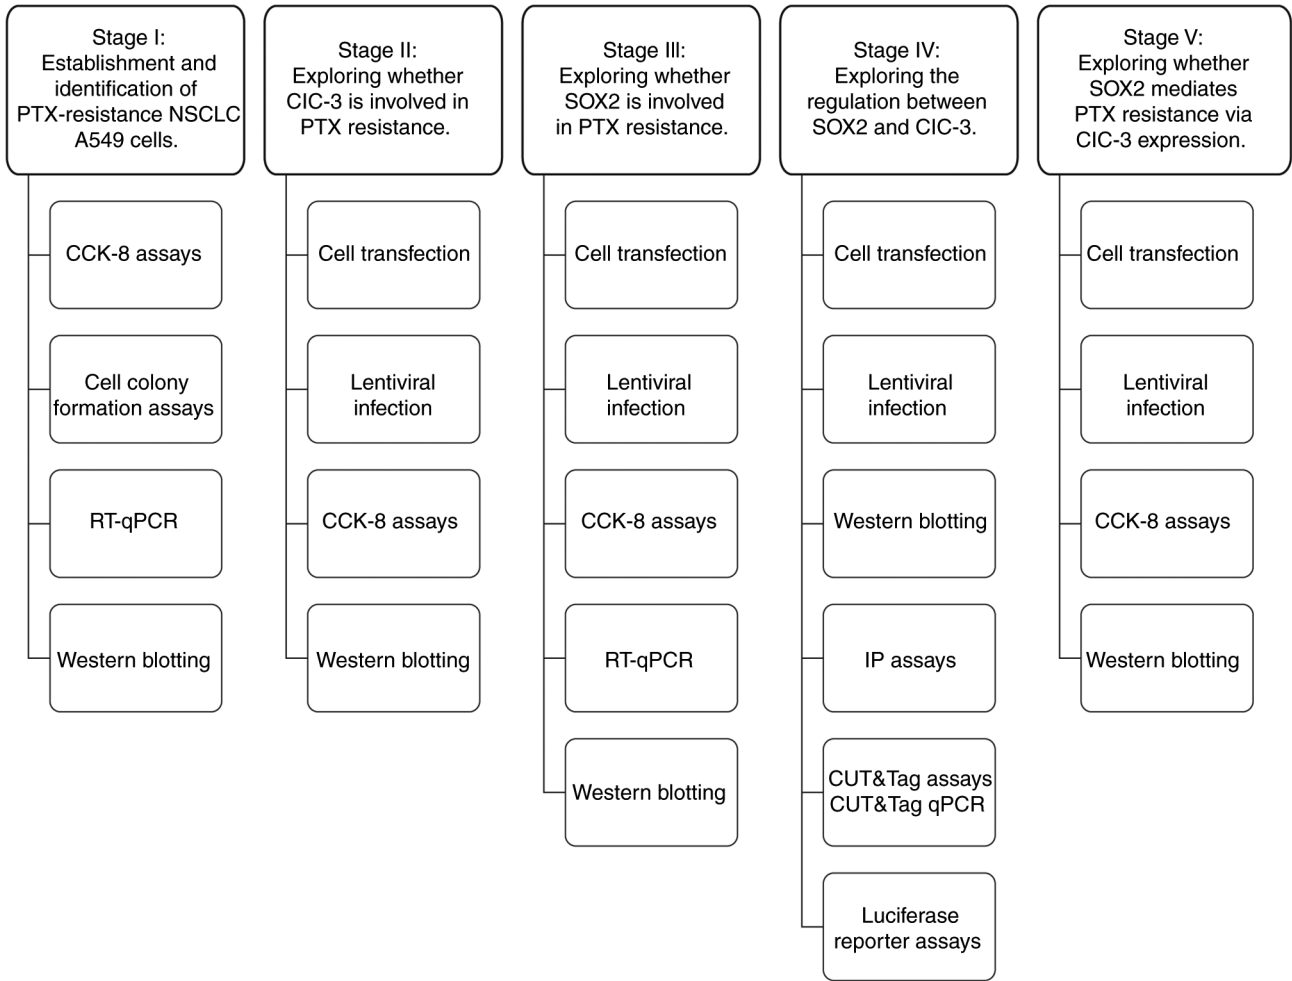

Supplement: Supplementary_Data.pdf [file Supplementary_Data.pdf]
